# Supplementary material for: Dynamic Autologous Reendothelialization of Small-Caliber Arterial Extracellular Matrix: A Preclinical Large Animal Study
Source: PubMed Central journal article supplement — Tissue Eng Part A. 2017 Jan 1;23(1-2):69–79. doi: 10.1089/ten.tea.2016.0126 (PMC5240014; doi:10.1089/ten.tea.2016.0126), 2017-01-01
Supplement: Supp_Fig1.pdf [file Supp_Fig1.pdf]

## Supplementary Data

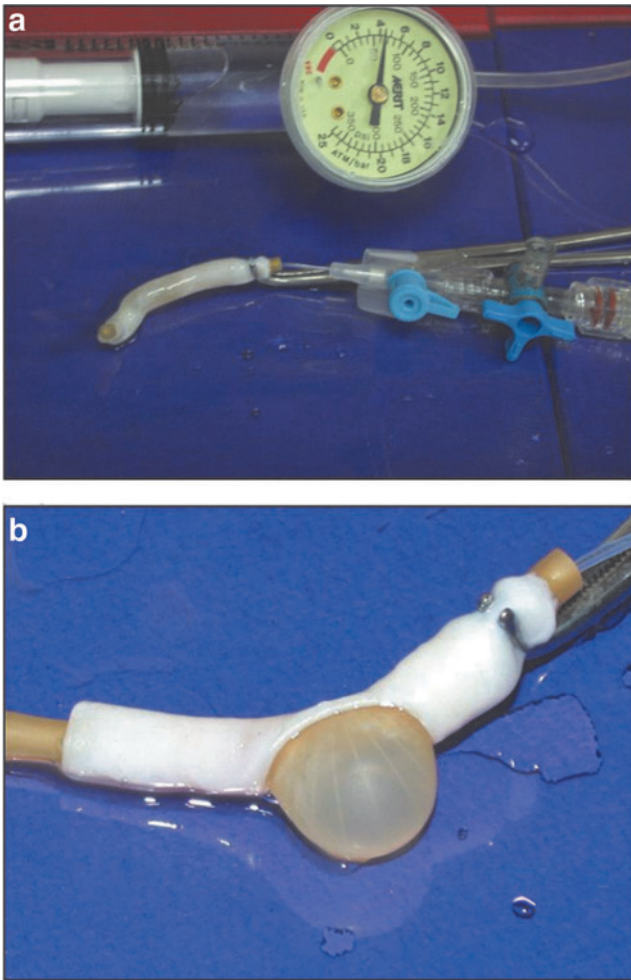

**SUPPLEMENTARY FIG. S1.** Characterization of scaECM and native porcine carotid artery burst pressure. Burst pressure measurement system setup **(a)** comprising a syringe pump equipped with a pressure gauge connected to urinary latex-coated balloon catheter (8Fr) that is concentrically located inside the graft lumen. Hydraulic inflation of the balloon catheter causes luminal pressure increase on the graft wall until rupture **(b)**, which is recorded as the burst pressure. scaECM, small-caliber arterial extracellular matrix.
