# Supplementary material for: Dynamic Autologous Reendothelialization of Small-Caliber Arterial Extracellular Matrix: A Preclinical Large Animal Study
Source: PubMed Central journal article supplement — Tissue Eng Part A. 2017 Jan 1;23(1-2):69–79. doi: 10.1089/ten.tea.2016.0126 (PMC5240014; doi:10.1089/ten.tea.2016.0126), 2017-01-01
Supplement: Supp_Fig2.pdf [file Supp_Fig2.pdf]

### Isolated psvECs

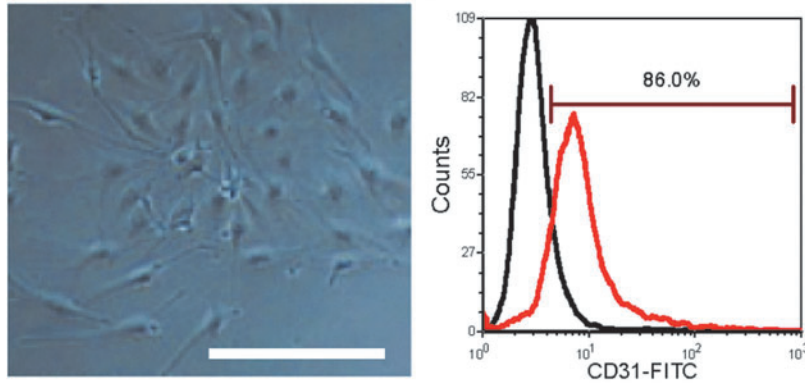

### Isolated pcaSMCs

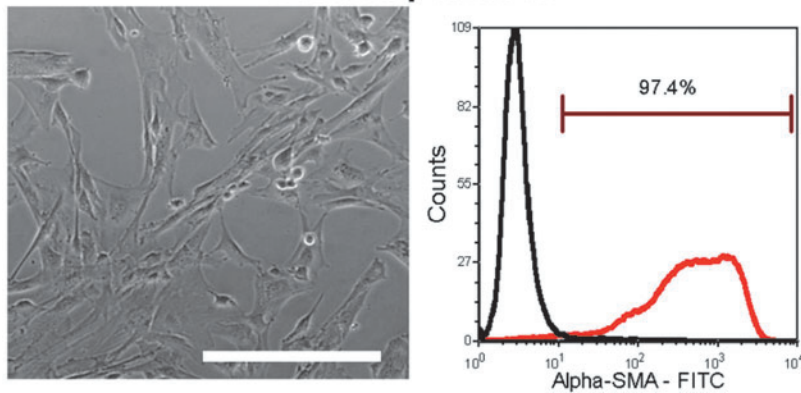

**SUPPLEMENTARY FIG. S2.** Characteristics of isolated primary psvECs and pcaSMCs. Isolated primary psvECs and pcaSMCs displayed characteristic tissue culture plate morphologies, indicating lineage commitment, as imaged through phase-contrast microscopy. Flow cytometry quantified at least 80% lineage integrity, by characteristic markers, in each culture (CD31 for ECs; smooth muscle actin for SMCs), as indicated. ECs, endothelial cells; pcaSMCs, porcine carotid artery SMCs; psvECs, porcine saphenous vein ECs; SMCs, smooth muscle cells.
