# Supplementary material for: Dynamic Autologous Reendothelialization of Small-Caliber Arterial Extracellular Matrix: A Preclinical Large Animal Study
Source: PubMed Central journal article supplement — Tissue Eng Part A. 2017 Jan 1;23(1-2):69–79. doi: 10.1089/ten.tea.2016.0126 (PMC5240014; doi:10.1089/ten.tea.2016.0126), 2017-01-01
Supplement: Supp_Table1.pdf [file Supp_Table1.pdf]

SUPPLEMENTARY TABLE S1. IMMUNOHISTOCHEMICAL AND IMMUNOFLUORESCENT STAINING DETAILS

| <i>Staining type</i> | <i>Antibody against</i>                                                                            | <i>Raised in</i> | <i>Supplier</i>   | <i>Catalog No.</i> | <i>Dilution</i> |
|----------------------|----------------------------------------------------------------------------------------------------|------------------|-------------------|--------------------|-----------------|
| IHC, FACS            | CD31, an EC marker                                                                                 | Mouse            | Dako              | M0823              | 1:100           |
| IHC, IF              | Chondroitin sulfate, a GAG marker, which is expressed by SMCs                                      | Mouse            | Sigma-Aldrich     | C8035              | 1:200           |
| IF                   | vWF, an EC marker                                                                                  | Rabbit           | Sigma-Aldrich     | F3520              | 1:800           |
| IF, IHC, FACS        | $\alpha$ SMA, an SMC marker <sup>a</sup>                                                           | Mouse            | Sigma-Aldrich     | C6198              | 1:200           |
| IHC                  | Myeloperoxidase, a neutrophil marker                                                               | Rabbit           | Dako              | A0398              | 1:700           |
| IHC                  | Lysozyme EC 3.2.1.17, a macrophage marker                                                          | Rabbit           | Dako              | A0099              | 1:300           |
| IHC                  | CD20, a B lymphocyte marker                                                                        | Rabbit           | Thermo Scientific | PA5-16701          | 1:500           |
| FACS, IF             | FITC-conjugated anti-mouse IgG                                                                     | Goat             | Sigma-Aldrich     | 8521               | 1:320           |
| FACS, IF             | FITC-conjugated anti-rabbit IgG                                                                    | Goat             | Sigma-Aldrich     | F0382              | 1:80            |
| IHC                  | Biotin-conjugated anti-mouse IgG                                                                   | Goat             | Vector Labs       | BA-9200            | 1:2000          |
| IHC                  | Biotin-free horseradish peroxidase (BOND™ polymer for refine detection) anti-mouse and rabbit IgGs | NA               | Leica Biosystems  | DS9800             | 1:200           |

<sup>a</sup>Two versions of this antibody were purchased—one was conjugated to Cy3 for IF stain and the other was nonconjugated and used in FACS.

EC, endothelial cell; GAG, glycosaminoglycan; IF, immunofluorescent; IHC, immunohistochemical; SMA, smooth muscle actin; SMCs, smooth muscle cells; vWF, von Willebrand factor.
