# Supplementary material for: Dynamic Autologous Reendothelialization of Small-Caliber Arterial Extracellular Matrix: A Preclinical Large Animal Study
Source: PubMed Central journal article supplement — Tissue Eng Part A. 2017 Jan 1;23(1-2):69–79. doi: 10.1089/ten.tea.2016.0126 (PMC5240014; doi:10.1089/ten.tea.2016.0126), 2017-01-01
Supplement: Supp_Table2.pdf [file Supp_Table2.pdf]

SUPPLEMENTARY TABLE S2. PRIMER SEQUENCES USED  
FOR COMPLEMENTARY DNA AMPLIFICATIONS

| <i>Gene</i>   | <i>Primers' sequence (5'-3')</i>                                          |
|---------------|---------------------------------------------------------------------------|
| TNF- $\alpha$ | Forward: GCCTCCCTCTCATCAGTTCT<br>Reverse: TGGTGGTTTGCTACGACGTG            |
| IL-1 $\beta$  | Forward: AGGATGAGGACATGAGCACC<br>Reverse: ATGGGAACGTCACACACCAG            |
| TIMP1         | Forward: GAGCCTGTACCTGCGTCCC<br>Reverse: ACGAACTTGGCCCTGATGAC             |
| MMP2          | Forward: TTGACGGCATCTCTCAGATCC<br>Reverse: CGTGGTGTCACTGTTTCGCC           |
| MMP14         | Forward: CCCAAAATCCCACCTACGG<br>Reverse: ACATCTCCCCTCGAAGCATG             |
| GAPDH         | Forward: CAC TCT TCC ACC TTC GAT GC<br>Reverse: AGG TCC ACC ACC CTG TTG C |

IL, interleukin; TNF, tumor necrosis factor.
